# Supplementary material for: ADe NovoGenome Assembly Algorithm for Repeats and Nonrepeats
Source: Hindawi journal article supplement (doi:10.1155/2014/736473), 2014-01-01
Supplement: f1 [file 736473.f1.pdf]

## Supplementary materials

In this part, we provide the supporting materials of the manuscript of SWA.

The total length of *A. dehalogenans* 2CP-C (NC\_007760) and *P. falciparum* 3D7 chr14 (NC\_004317) are 3291834bp and 5013479bp respectively. The corresponding base counts of them are presented in S-Table 2. These two chromosomes represent the two extreme examples of CG contents. The CG contents of them are 18.4% and 74.9% respectively.

**S-Table 1. The results of SWA in datasets *A. dehalogenans* 2CP-C (NC\_007760) and *P. falciparum* 3D7 chr14 (NC\_004317)**

| Species      | Repeat |          |      | Contigs.(kb) |      | Accuracy(%) |              |            | Genome coverage(%) |
|--------------|--------|----------|------|--------------|------|-------------|--------------|------------|--------------------|
|              | TRC    | CNRC     | NNC  | N50          | Max  | CN-accuracy | Rep-accuracy | C-accuracy |                    |
| A.deha       | 50     | appendix | 1485 | 4.1          | 29.1 | 96%         | 87%          | 100%       | 102.6%             |
| Chr14-P.falc | 37     | appendix | 865  | 18.7         | 65.9 | 95.3%       | 91.9%        | 100%       | 100.2%             |

Contigs of repeat and non-repeat are generated in independent way by SWA with basic parameters: sequencing depth  $S_d=2$ , read length  $L_r = 50$ , filtered times=1, sliding window=3. Contigs smaller than 80 are removed.

From the S-Table 1, we can clearly see that SWA performs well in these two chromosomes. For *A.deha*, the CG content is only 18.4%. The performances of SWA are still good, especially for the accuracy of assembled repeats. The metrics such as TRC, CN-accuracy, Rep-accuracy and C-accuracy are very good. For chr14-*P.falc*, the CG content is only 74.9%. The performances of SWA are still good, especially for the accuracy of assembled repeats. The metrics such as TRC, CN-accuracy, Rep-accuracy and C-accuracy are very good. All of these indicate that the CG contents have little to the performances of assembling repeats and non-repeats independently, which validate that SWA is robust to the CG contents.

**S-Table 2. The CG contents of *A.deha* and chr14-*P.falc***

| base | <i>A. dehalogenans</i> | <i>P. falciparum</i> 3D7 chr14 |
|------|------------------------|--------------------------------|
| A    | 1338715                | 626051                         |
| C    | 301268                 | 1882373                        |
| G    | 305650                 | 1872987                        |
| T    | 1346201                | 632068                         |

**S-Table 3. The detailed information of repeats contained in simulated datasets**

| Model sequences | Repetitive contents  | Length | Copies |
|-----------------|----------------------|--------|--------|
| Sequence A      | Interspersed repeats | 500    | 8      |
|                 |                      | 1000   | 10     |
|                 |                      | 2000   | 8      |
|                 |                      | 3000   | 6      |
|                 |                      | 4000   | 5      |

|            |                  | 5000                      | 3 |
|------------|------------------|---------------------------|---|
| Sequence B | Tandem           | 1000 and 5000             | 5 |
|            |                  | 2000 and 4000             | 4 |
|            | repeats          | 3000 and 3000             | 6 |
| Sequence C | Compound repeats | Sequence A and Sequence B |   |

**The following is the detailed generation process of three real simulated datasets, which contain different contents of repeats.**

**Sequence A contains interspersed repeats**

```
SequenceA=randseq(500000);
>> b=randseq(500);
>> c=randseq(1000);
>> d=randseq(2000);
>> e=randseq(3000);
>> f=randseq(4000);
>> g=randseq(5000);
>> SequenceA(1001:1500)=b;
>> SequenceA(2001:2500)=b;
>> SequenceA(3001:3500)=b;
>> SequenceA(4001:4500)=b;
>> SequenceA(5001:5500)=b;
>> SequenceA(6001:6500)=b;
>> SequenceA(8001:8500)=b;
>> SequenceA(9001:9500)=b;
>> SequenceA(12001:13000)=c;
>> SequenceA(22001:23000)=c;
>> SequenceA(32001:33000)=c;
>> SequenceA(42001:43000)=c;
>> SequenceA(52001:53000)=c;
>> SequenceA(62001:63000)=c;
>> SequenceA(72001:73000)=c;
>> SequenceA(82001:83000)=c;
>> SequenceA(92001:93000)=c;
>> SequenceA(102001:103000)=c;
>> SequenceA(202001:204000)=d;
>> SequenceA(252001:254000)=d;
>> SequenceA(272001:274000)=d;
>> SequenceA(292001:294000)=d;
>> SequenceA(322001:324000)=d;
```

```
>> SequenceA(342001:344000)=d;
>> SequenceA(362001:364000)=d;
>> SequenceA(382001:384000)=d;
>> SequenceA(402001:405000)=e;
>> SequenceA(422001:425000)=e;
>> SequenceA(442001:445000)=e;
>> SequenceA(452001:455000)=e;
>> SequenceA(462001:465000)=e;
>> SequenceA(466001:469000)=e;
>> SequenceA(472001:476000)=f;
>> SequenceA(477001:481000)=f;
>> SequenceA(483001:487000)=f;
>> SequenceA(488001:492000)=f;
>> SequenceA(493001:497000)=f;
>> SequenceA(260001:265000)=g;
>> SequenceA(280001:285000)=g;
>> SequenceA(300001:305000)=g;
```

**Sequence B contains tandem repeats.**

```
Sequence B=randseq(500000);
>> b=randseq(500);
>> c=randseq(1000);
>> d=randseq(2000);
>> e=randseq(3000);
>> f=randseq(4000);
>> SequenceB(1001:1500)=b;
>> SequenceB(1501:2000)=b;
>> SequenceB(2001:2500)=b;
>> SequenceB(5001:5500)=b;
>> SequenceB(5501:6000)=b;
>> SequenceB(6001:6500)=b;
```

```

>> SequenceB(8001:8500)=b;
>> SequenceB(8501:9000)=b;
>> SequenceB(9001:9500)=b;
>> SequenceB(10001:11000)=c;
>> SequenceB(11001:12000)=c;
>> SequenceB(12001:13000)=c;
>> SequenceB(13001:14000)=c;
>> SequenceB(14001:15000)=c;
>> SequenceB(24001:25000)=c;
>> SequenceB(25001:26000)=c;
>> SequenceB(26001:27000)=c;
>> SequenceB(27001:28000)=c;
>> SequenceB(28001:29000)=c;
>> SequenceB(41001:42000)=c;
>> SequenceB(42001:43000)=c;
>> SequenceB(43001:44000)=c;
>> SequenceB(44001:45000)=c;
>> SequenceB(45001:46000)=c;
>> SequenceB(65001:66000)=c;
>> SequenceB(66001:67000)=c;
>> SequenceB(67001:68000)=c;
>> SequenceB(68001:69000)=c;
>> SequenceB(69001:70000)=c;
>> SequenceB(101001:103000)=d;
>> SequenceB(103001:105000)=d;
>> SequenceB(105001:107000)=d;
>> SequenceB(201001:203000)=d;
>> SequenceB(203001:205000)=d;
>> SequenceB(205001:207000)=d;
>> SequenceB(251001:253000)=d;
>> SequenceB(253001:255000)=d;
>> SequenceB(255001:257000)=d;
>> SequenceB(303001:305000)=d;
>> SequenceB(305001:307000)=d;
>> SequenceB(307001:309000)=d;
>> SequenceB(323001:325000)=d;
>> SequenceB(325001:327000)=d;
>> SequenceB(327001:329000)=d;
>> SequenceB(345001:347000)=d;
>> SequenceB(347001:349000)=d;
>> SequenceB(349001:351000)=d;
>> SequenceB(361001:364000)=e;
>> SequenceB(364001:367000)=e;
>> SequenceB(367001:370000)=e;
>> SequenceB(372001:375000)=e;
>> SequenceB(375001:378000)=e;
>> SequenceB(378001:381000)=e;
>> SequenceB(383001:386000)=e;
>> SequenceB(386001:389000)=e;
>> SequenceB(389001:392000)=e;
>> SequenceB(393001:397000)=f;
>> SequenceB(397001:401000)=f;
>> SequenceB(403001:407000)=f;
>> SequenceB(407001:411000)=f;
>> SequenceB(427001:421000)=f;
>> SequenceB(427001:431000)=f;
>> SequenceB(431001:435000)=f;
>> SequenceB(440001:445000)=g;
>> SequenceB(445001:450000)=g;
>> SequenceB(475001:480000)=g;
>> SequenceB(480001:485000)=g;
>> SequenceB(490001:495000)=g;
>> SequenceB(495001:500000)=g;

```

**Sequence C contains compound repeats**

**SequenceC=SequenceA+SequenceB**

## Appendix

Table 1:

Compound repeats—CNRC={ [6][6][18][9] [8][3] [4][5][20][10][9][8] }

Table 2:

Sequencing depth=2: CNRC={ [3][4][2][6][2][5][2][2][2] }

Sequencing depth=1: CNRC={ [3][2][4][6][5][2][2][2][2][2][2][2][2] }

Sequencing depth=0.5: CNRC={ [3][4][3][6][3][3][3][5][3][3][3][2][3][3] }
